# Supplementary material
Source: Royal Society of Chemistry journal article supplement (doi:10.1039/d6ta00597g)
Supplement: d6ta00597g1.pdf [file d6ta00597g1.pdf]

*Supporting Information for*

## **Enhanced photocatalytic hydrogen evolution *via* optimization of interfacial energy and mass flows**

Chunyang Zhang,<sup>a†</sup> Shidong Zhao,<sup>a†</sup> Shujian Wang,<sup>\*a†</sup> Jie Huang,<sup>a</sup> Biao Wang,<sup>a</sup> Kejian Lu,<sup>a</sup> Rui Zhao,<sup>a</sup> Rui Song,<sup>\*a,c</sup> Maochang Liu<sup>\*a,b</sup>

<sup>a</sup>International Research Center for Renewable Energy, State Key Laboratory of Multiphase Flow in Power Engineering, School of Energy and Power Engineering, Xi'an Jiaotong University, Xi'an, Shaanxi 710049, P. R. China

<sup>b</sup>Suzhou Academy of Xi'an Jiaotong University, Suzhou, Jiangsu 215123, P. R. China

<sup>c</sup>Solar Fuels Group, Department of Chemistry, University of Toronto, 80 St. George Street, Toronto, Ontario M5S 3H6, Canada.

<sup>†</sup>C.Z., S.Z. and S.W. contributed equally to this work.

\*Corresponding authors: wangshj@stu.xjtu.edu.cn (S. W.), ruisong.song@mail.utoronto.ca (R. S.), maochangliu@mail.xjtu.edu.cn (M. L.)

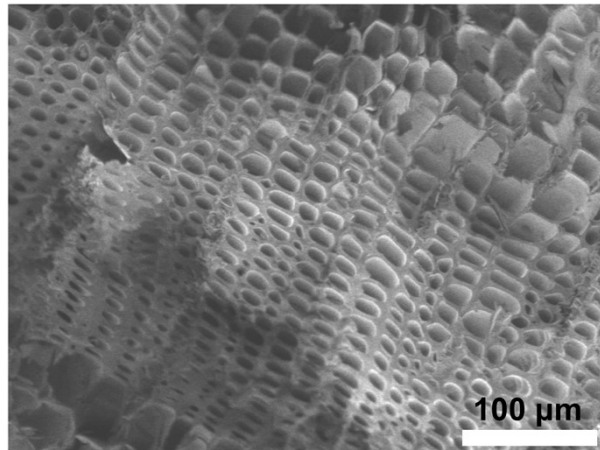

**Fig S1.** Cross-sectional SEM image of CW.

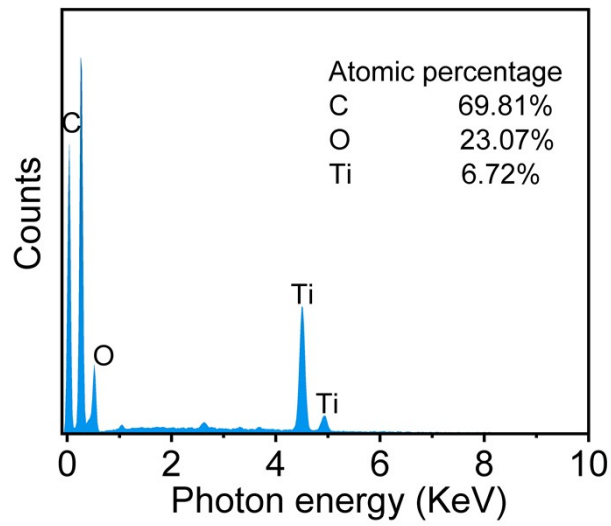

**Fig. S2.** EDX spectrum of T/CW.

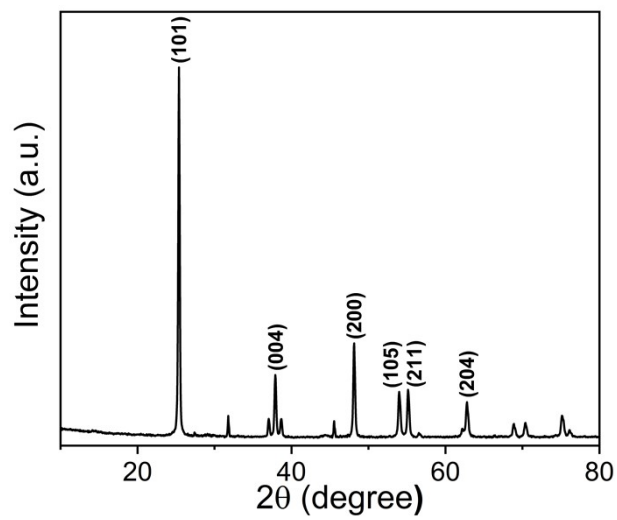

**Fig S3.** XRD pattern of TiO<sub>2</sub>.

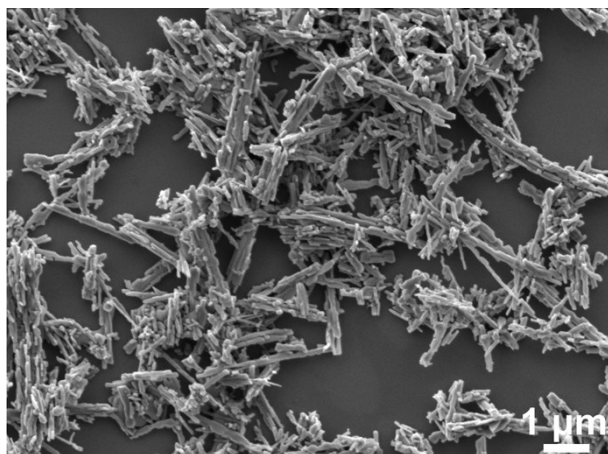

**Fig S4.** SEM image of TiO<sub>2</sub>.

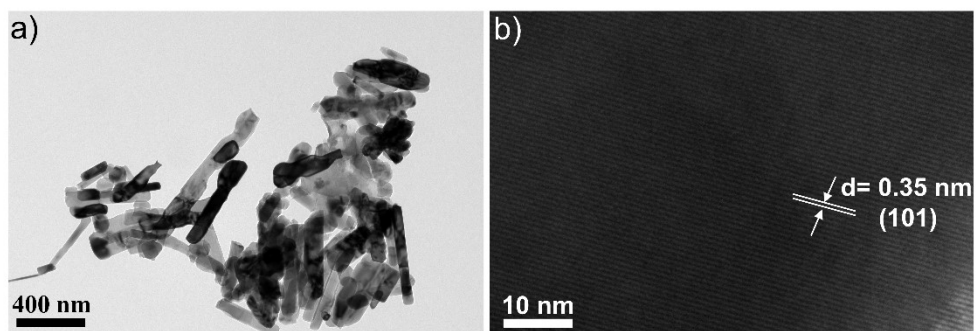

**Fig S5.** TEM images of TiO<sub>2</sub>. (a) TEM and (b)HRTEM.

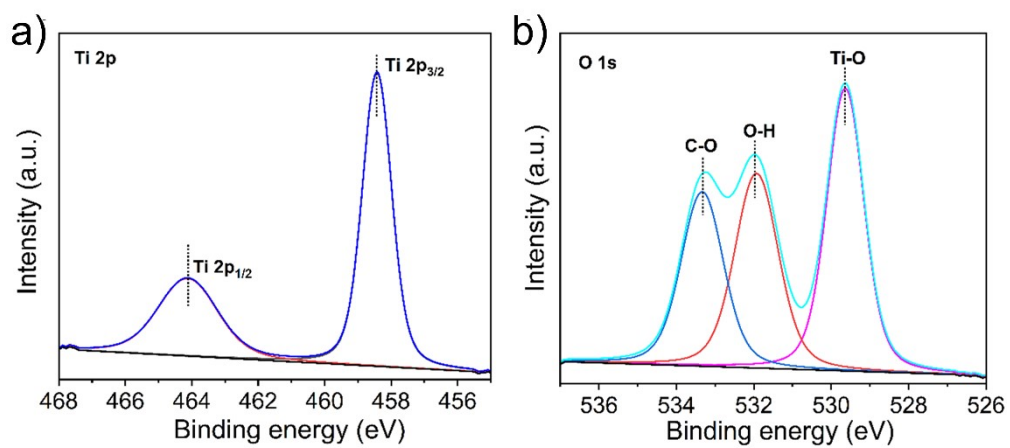

**Fig S6.** The high-resolution XPS spectras of (a) Ti and (b) O1s.

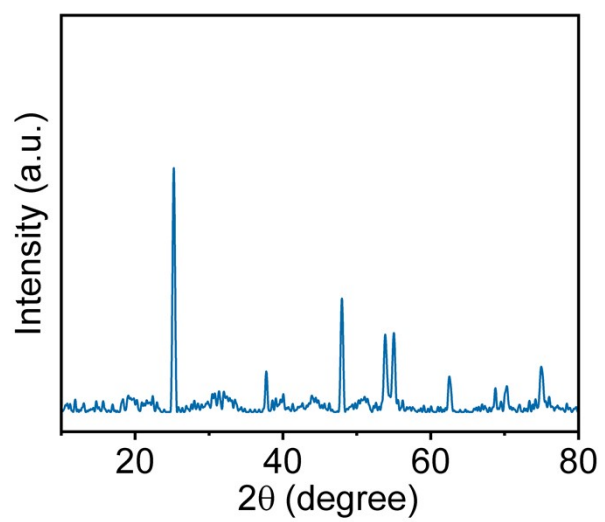

**Fig. S7.** XRD pattern of the TiO<sub>2</sub> with a Pt loading of 1.0 wt%.

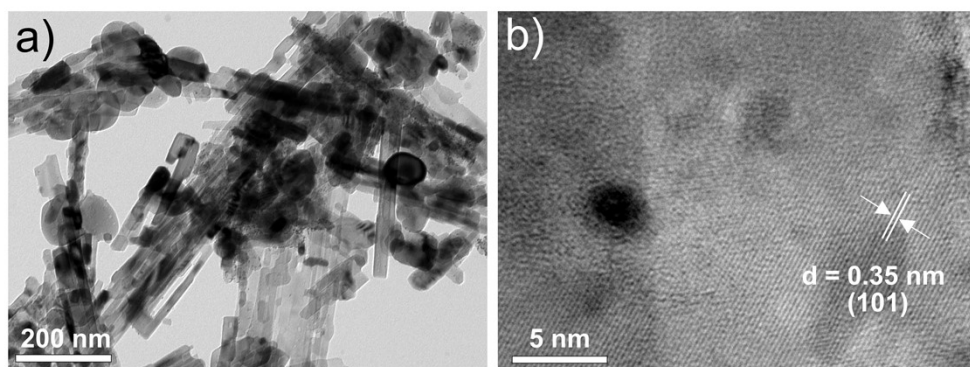

**Fig. S8.** TEM and HRTEM images of the  $\text{TiO}_2$  with a Pt loading of 1.0 wt%. (a) TEM. (b) HRTEM.

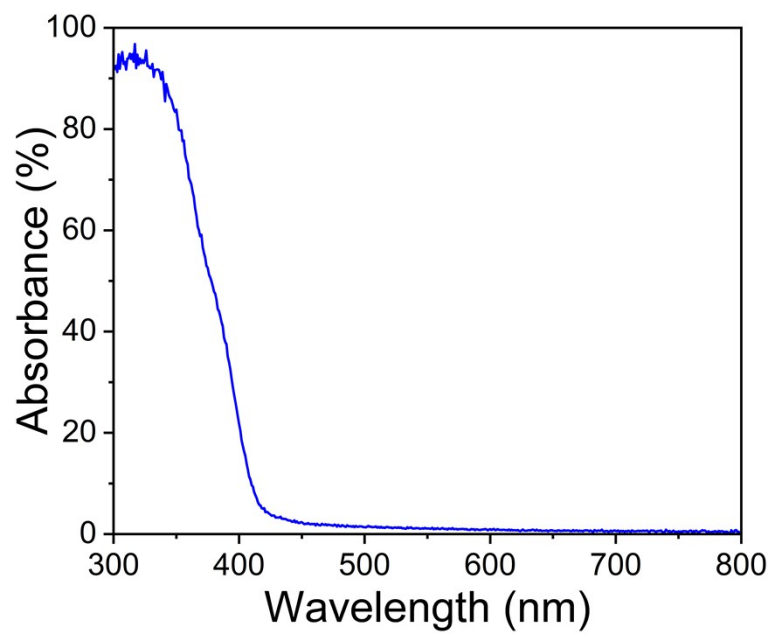

**Fig S9.** UV-vis diffuse-reflectance spectra of TiO<sub>2</sub>.

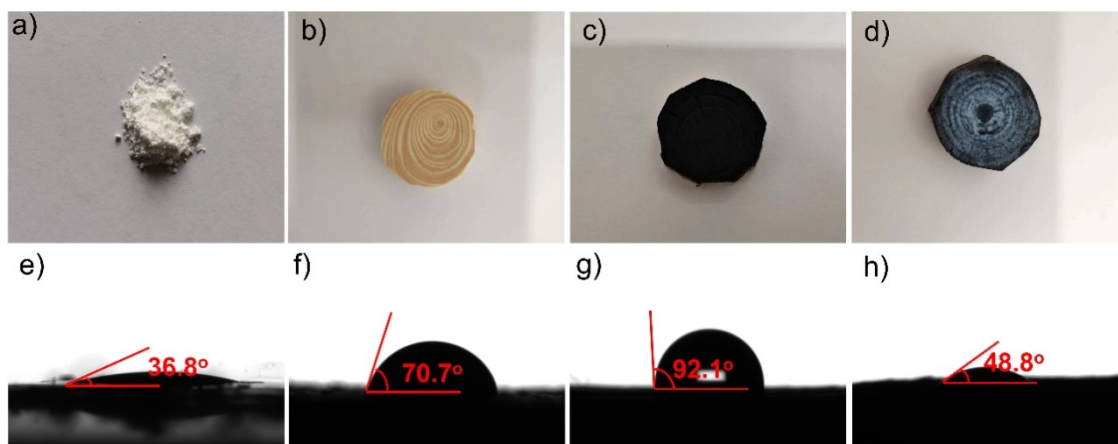

**Fig S10.** (a-d) photos of the TiO<sub>2</sub>, Wood, CW and T/CW. (e-h) The contact angle measurement of TiO<sub>2</sub>, Wood, CW and T/CW.

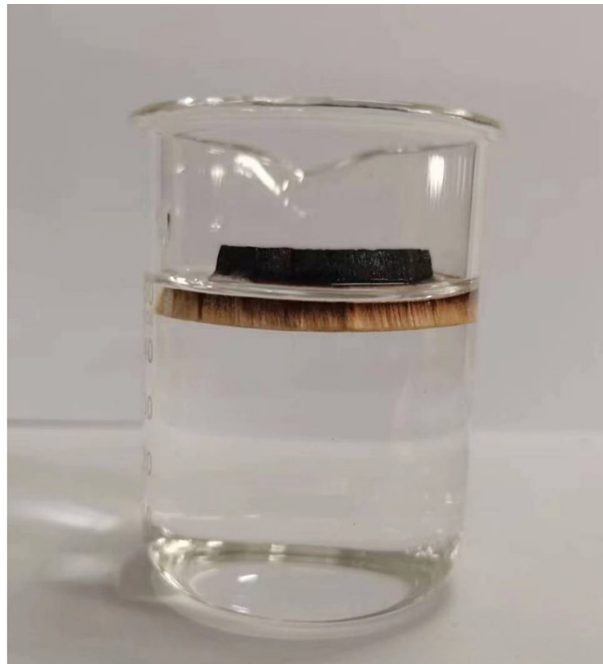

**Fig S11.** Photo of T/C-W floating on liquid water.

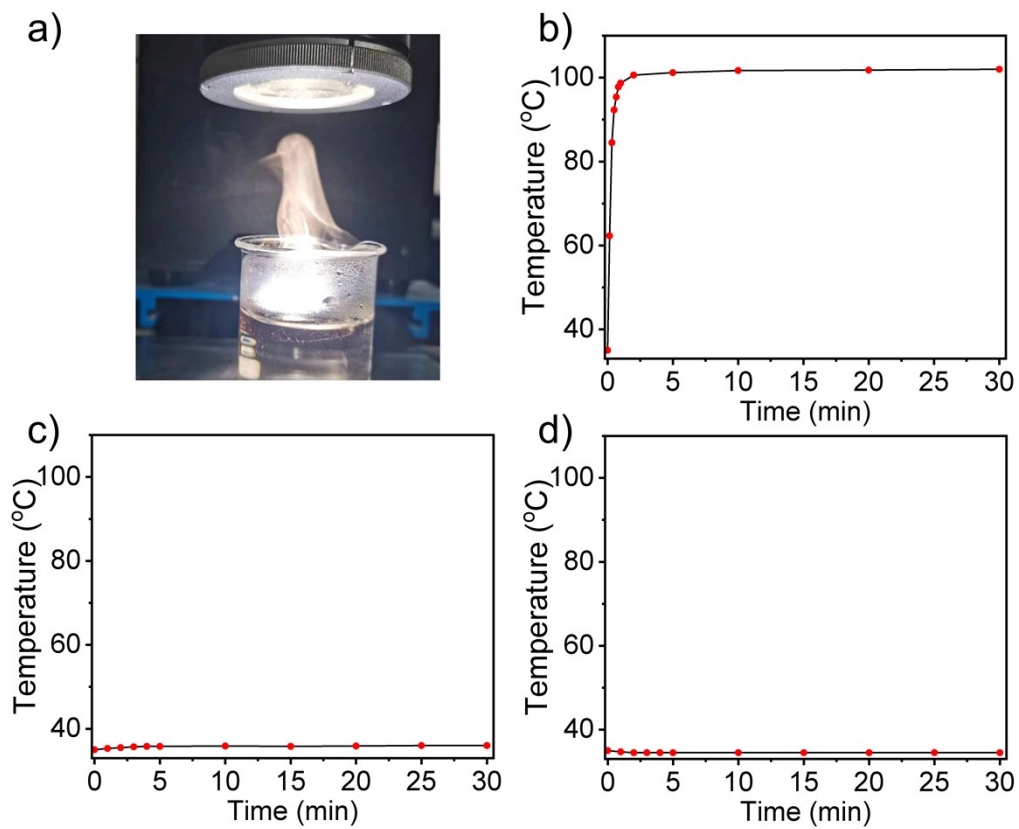

**Fig. S12.** (a) Photo of steam generation of the biphasic T/CW system under solar irradiation. (b) T/CW surface temperature as a function of time. (c) Water temperature as a function of time without T/CW. (d) Water temperature as a function of time with T/CW.

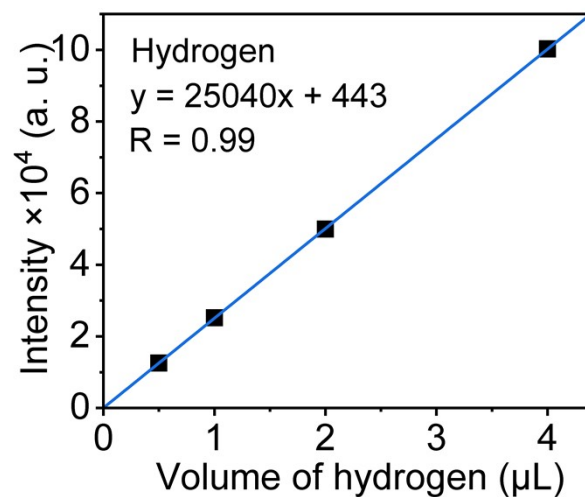

**Fig. S13.** High performance Gas chromatography (GC) quantitative curve of hydrogen samples.

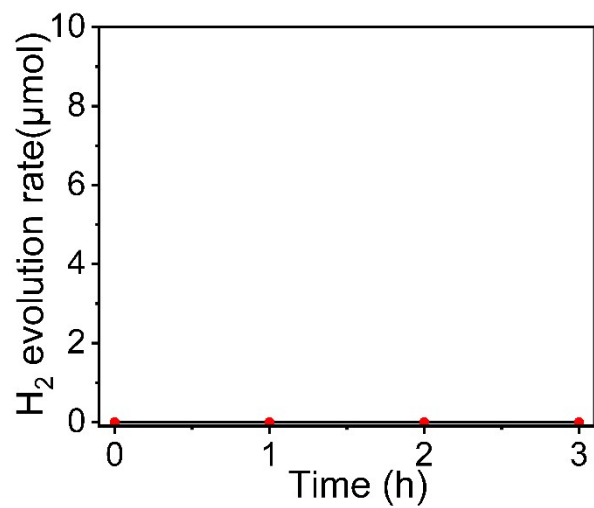

**Fig S14.** Time-dependent photocatalytic H<sub>2</sub> evolution of T/CW system without solar irradiation.

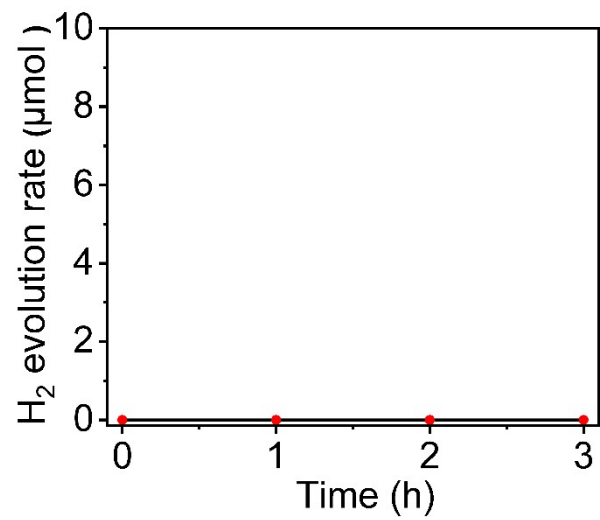

**Fig S15.** Time-dependent photocatalytic H<sub>2</sub> evolution of CW system without photocatalyst.

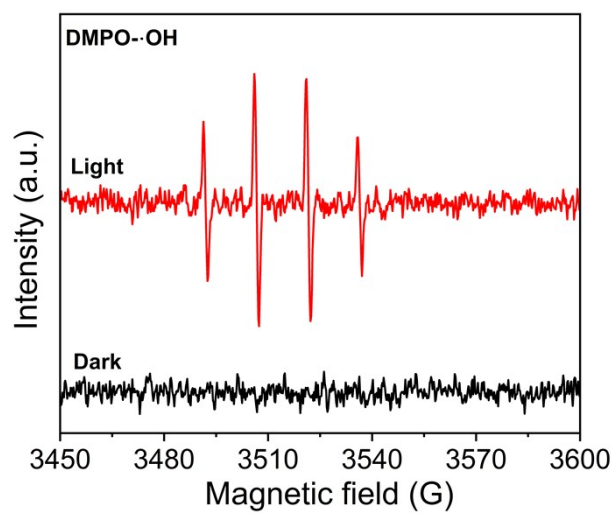

**Fig S16.** ESR spectra for identifying DMPO-•OH under dark and solar irradiation.

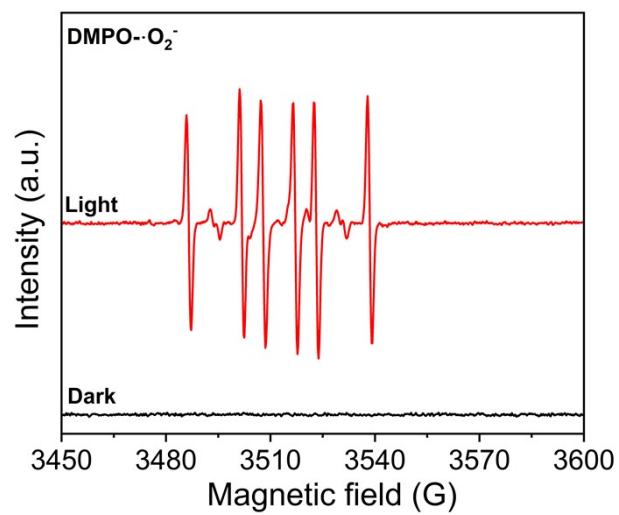

**Fig S17.** ESR spectra for identifying DMPO- $\text{O}_2^-$  under dark and solar irradiation.

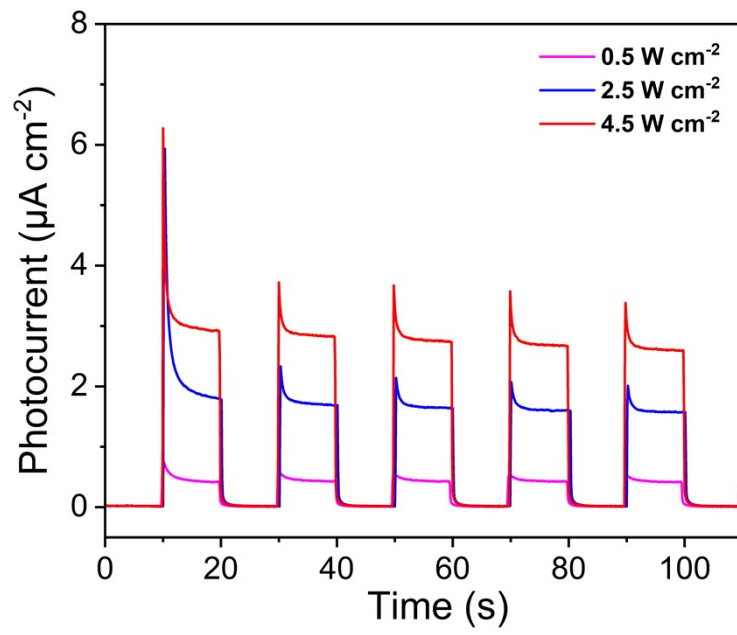

**Fig S18.** Photocurrent responses curves of TiO<sub>2</sub> under different solar intensity.

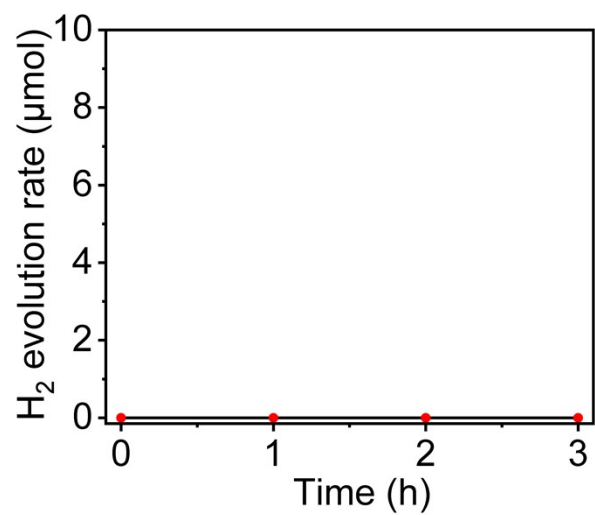

**Fig. S19.** Photocatalytic H<sub>2</sub> evolution performance of the T/CW system under 95°C and dark conditions.

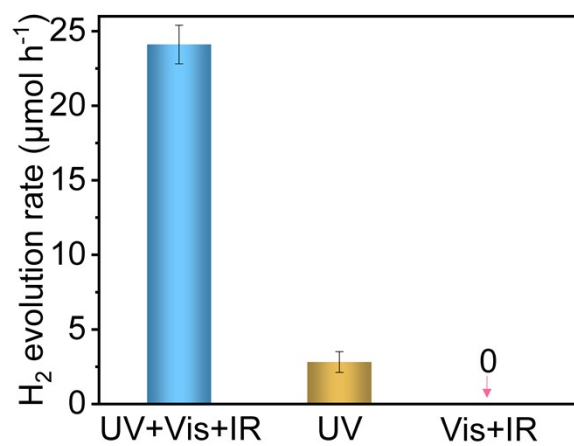

**Fig. S20.** Photocatalytic H<sub>2</sub> evolution performance of the T/CW system under full-spectrum(UV+Vis+IR), ultraviolet (UV), and visible-infrared (Vis+IR) light. Bars show the mean of three independent experiments, with error bars representing the range (min to max).

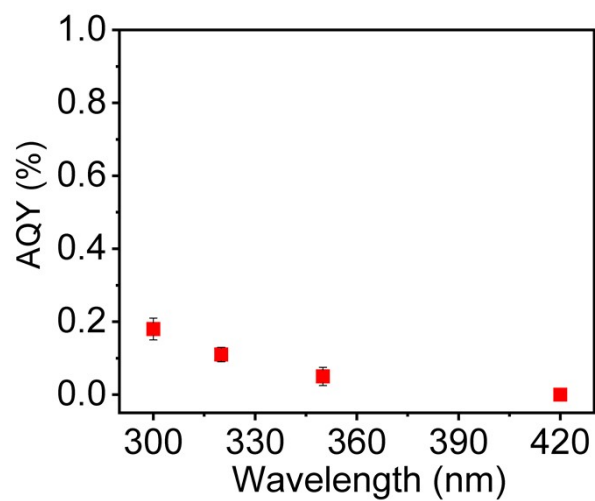

**Fig. S21.** Wavelength-dependent apparent quantum yield (AQY) for photocatalytic water splitting for the T/CW system.

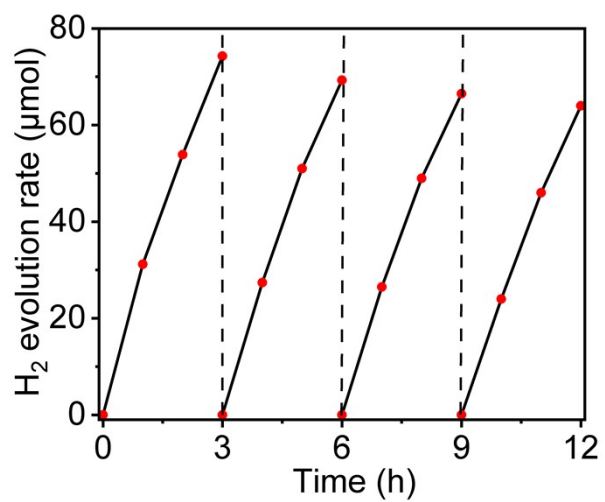

**Fig. S22.** Time-dependent photocatalytic H<sub>2</sub> evolution of T/CW system with simulated seawater.

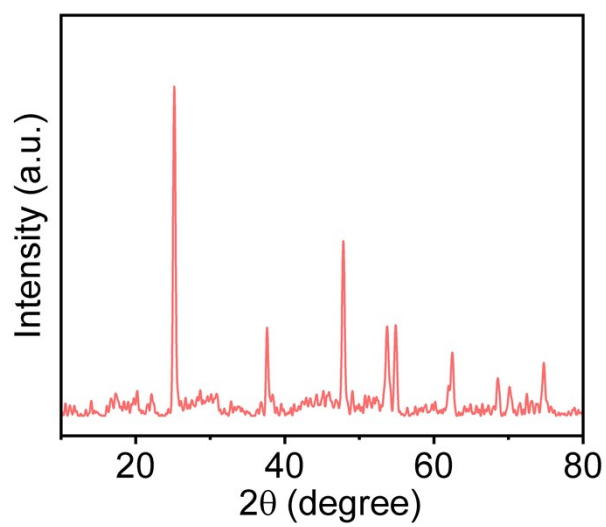

**Fig. S23.** XRD pattern of TiO<sub>2</sub> with a Pt loading of 1.0 wt% after 12 h of photocatalytic reaction in the biphasic system with simulated seawater.

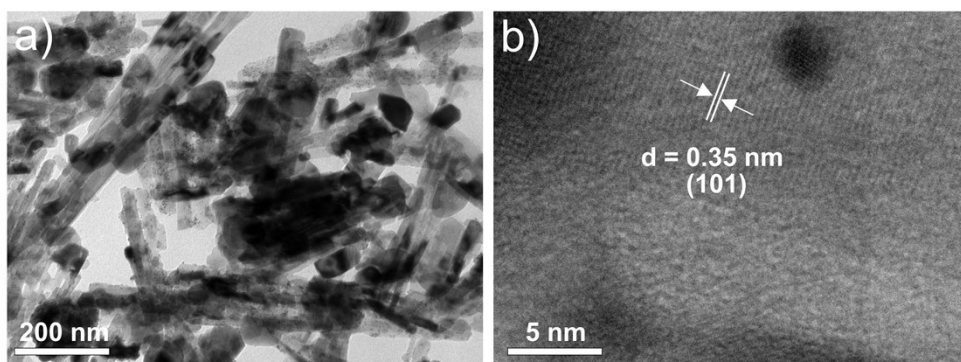

**Fig. S24.** TEM and HRTEM images of Pt-TiO<sub>2</sub> after 12 h of photocatalytic reaction in the biphasic system with simulated seawater. (a) TEM . (b) HRTEM.

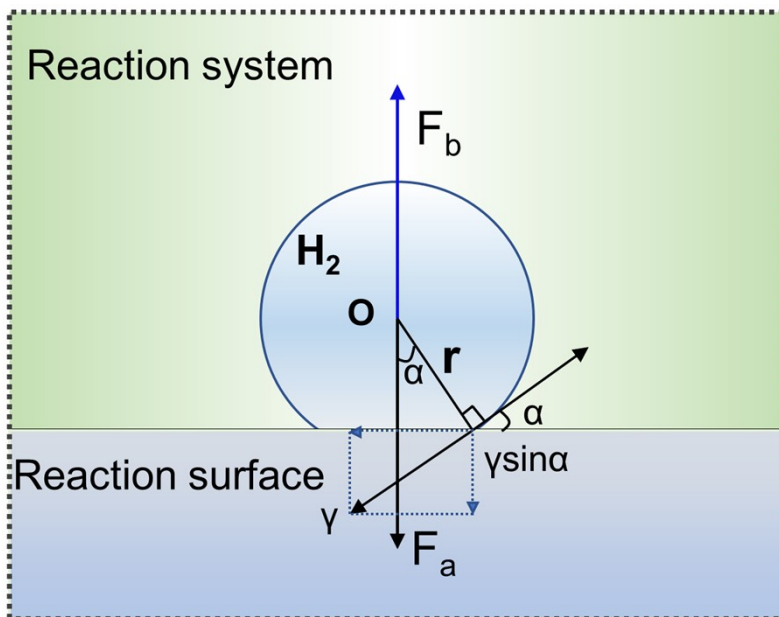

**Fig S25.** Force analysis of the bubble sticking on the reaction interface.

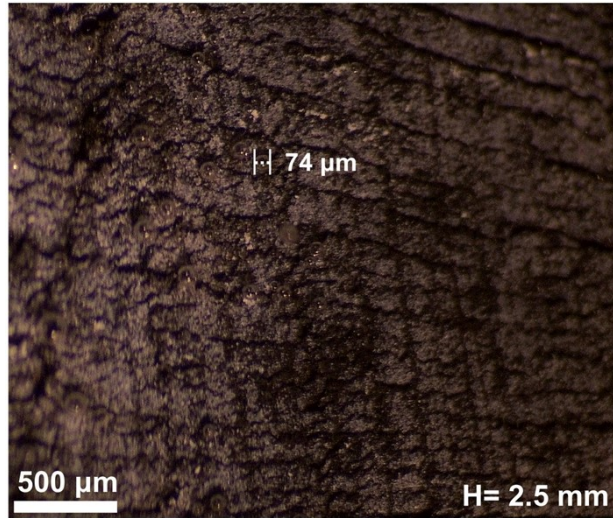

**Fig S26.** Photo of bubbles at the distance of 2.5 mm below water surface.

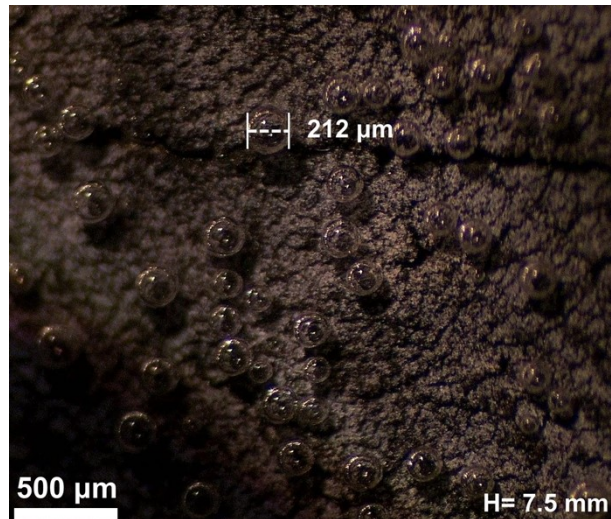

**Fig S27.** Photo of bubbles at the distance of 7.5 mm below water surface.
